# Supplementary material
Source: PubMed Central journal article supplement (PMC1177369)
Supplement: pnas_0501691102_2.pdf [file pnas_0501691102_2.pdf]

|        |                                                     |            |            |
|--------|-----------------------------------------------------|------------|------------|
| Try-2  | -329                                                | -128       | -83        |
|        | GATGACA.....GACTCTGGGAAGA.....CTGCAGCTA.....ATG     |            |            |
| Amy-2  | -306                                                | -158       | -113       |
|        | GATAACA.....CTCCATGGGAGTTTC.....CAGCTGTGC.....ATG   |            |            |
| Ela-1  | -186                                                | -99        | -91        |
|        | GATATCG.....CAGGTGACAT.....AAGGCAGGGAAAAT.....ATG   |            |            |
| Ela-2  | -92                                                 | -65        | -52        |
|        | GACTTTGGGAAAAT.....GATAGGA....CTCCACCTTGCATA....ATG |            |            |
| CE-Lip | -288                                                | -229       | -200       |
|        | GATACAT.....TGGGAA.....CAGCTG.....ATG               |            |            |
|        | ■ GATA-3                                            | ■ p64-PTF1 | ■ p48-PTF1 |
