# Supplementary material
Source: PubMed Central journal article supplement (PMC1177369)

Day 0

Day 2

Day 7

Day 14

Plg<sup>+</sup>

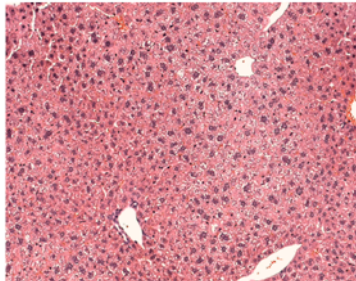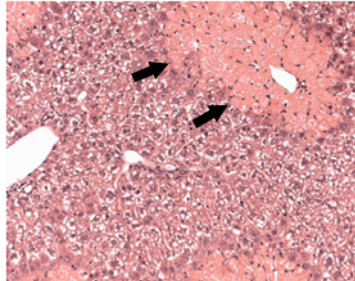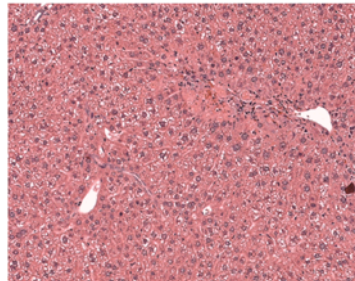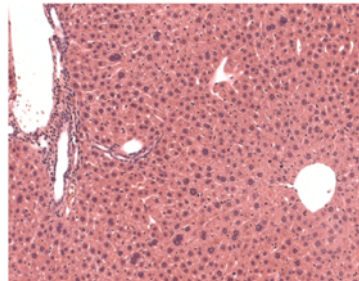

Plg<sup>0</sup>

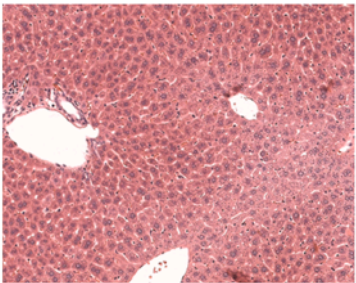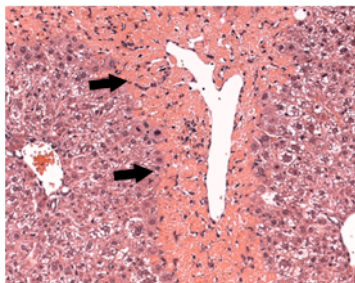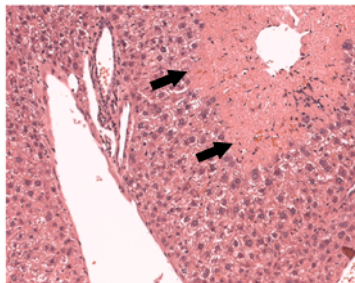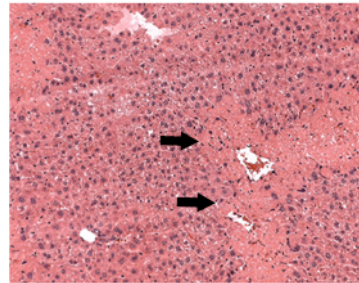

Supplement: pnas_0501691102_1.pdf [file pnas_0501691102_1.pdf]

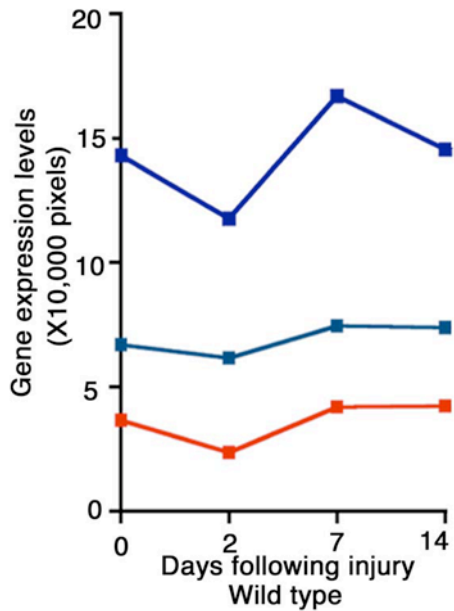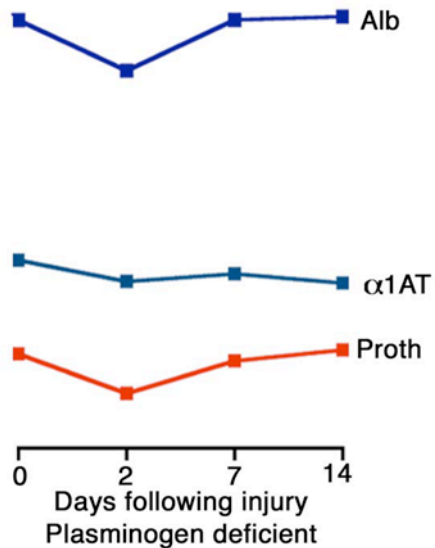

Supplement: pnas_0501691102_3.pdf [file pnas_0501691102_3.pdf]

Plg<sup>+</sup>

Plg<sup>0</sup>

Amylase

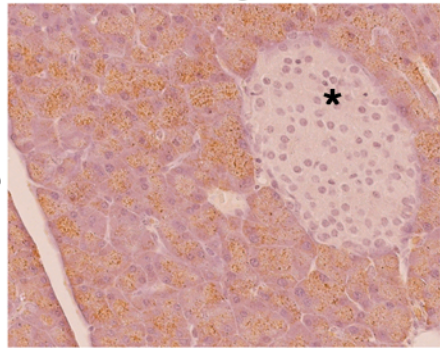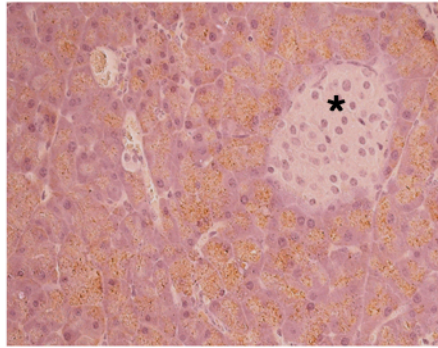

Lac Z

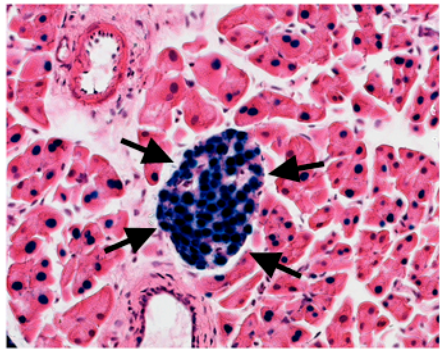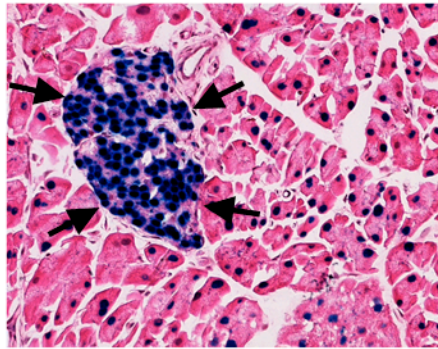

Supplement: pnas_0501691102_4.pdf [file pnas_0501691102_4.pdf]
